# Supplementary material
Source: ML conference proceedings conference paper supplement (https://openreview.net/forum?id=vOEXS39nOF)
Supplement: supplementary_material [file attachment]

## A HYPER-PARAMETERS

| Symbol               | Value           | Description                                                 |
|----------------------|-----------------|-------------------------------------------------------------|
| $t_x, w_x, h_x, c_x$ | 11, 128, 128, 3 | Video dimensions                                            |
| $t_p, w_p, h_p, c_p$ | 2, 8, 8, 3      | Patches dimensions (all frames except the first one)        |
| $t_z, w_z, h_z$      | 6, 16, 16       | Video tokens dimension (before linear projection)           |
| $h_z$                | 512             | Hidden size in the transformer layer                        |
| $d_z$                | 32              | Embedding dimension (after linear projection)               |
| —                    | 4               | Number of layers for spatial transformer                    |
| —                    | 4               | Number of layers for temporal transformer                   |
| —                    | 2048            | MLP size                                                    |
| $ E $                | 8192            | Codebook size                                               |
| -                    | AdamW           | Optimizer                                                   |
| $\beta_1$            | 0.9             | first moment of gradient                                    |
| $\beta_2$            | 0.99            | second moment of gradient                                   |
| -                    | 1e-4            | Learning rate                                               |
| -                    | 1e-4            | Weight decay                                                |
| -                    | Cosine decay    | Learning rate scheduler                                     |
| -                    | 1M              | Target number of training steps for learning rate scheduler |
| -                    | 100K            | Warmup steps                                                |
| -                    | 10              | Gradient clipping magnitude                                 |
| -                    | 1028            | Batch size                                                  |

**Table 6.** Hyperparamters used for C-ViViT architecture and optimizer.

| Symbol    | Value        | Description                                                 |
|-----------|--------------|-------------------------------------------------------------|
| $ z $     | 1536         | Sequence Length                                             |
| -         | 24           | Number of layer                                             |
| -         | 2048         | Embedding dimension                                         |
| -         | 8192         | MLP dimension                                               |
| -         | 32           | Number of heads                                             |
| -         | AdamW        | Optimizer                                                   |
| $\beta_1$ | 0.9          | first moment of gradient                                    |
| $\beta_2$ | 0.99         | second moment of gradient                                   |
| -         | 1e-4         | Learning rate                                               |
| -         | 1e-4         | Weight decay                                                |
| -         | Cosine decay | Learning rate scheduler                                     |
| -         | 4M           | Target number of training steps for learning rate scheduler |
| -         | 10K          | Warmup steps                                                |
| -         | 10           | Gradient clipping magnitude                                 |
| -         | 512          | Batch size                                                  |

**Table 7.** Hyperparamters used for MaskGIT architecture and optimizer.

## B DETAILS OF EXPERIMENTS

### B.1 VIDEO QUANTIZATION

#### B.1.1 NETWORK ARCHITECTURE

All encoder-decoder baselines have approximately 50M parameters. The Convolutional baseline encoder architecture consists of 5 convolutional blocks with channel multipliers of [1, 1, 2, 2, 4], 2 residual layers and 128 hidden units per block, and embedding dimension of 256. The ViT baseline encoder architecture consists of an image patchification step over non-overlapping  $8 \times 8$  spatial patches which are linearly transformed into image tokens. Next, we follow with 8 transformer layers with 512 hidden units, 8 attention heads, 2048 mlp units, and embedding dimension of 32. C-ViViT encoder architecture patches the first frame to non-overlapping  $8 \times 8$  patches, and then the rest of

the frames to non-overlapping  $2 \times 8 \times 8$  spatio-temporal patches which are linearly transformed into video embeddings. Next, C-ViViT encoder architecture consists of 4 spatial and 4 temporal transformer layers with 512 hidden units, 8 attention heads, 2048 mlp hidden units, and embedding dimension of 32. The decoder architecture for all models is the same as the encoder but in reverse to put the latent embeddings back to image space. The VQ objective is trained with commitment loss of  $\beta = 0.25$  and codebook size of 8192. The discriminator architecture is the StyleGAN [25] discriminator with blur resample, and channel multiplier of 1.

### B.1.2 TRAINING

We train all encoder-decoder baselines and with StyleGAN [25] discriminators with a batch size of 128 using Adam optimizer [27] with  $\beta_1 = 0.9$  and  $\beta_2 = 0.99$ . We use a linear learning rate warmup to a peak value of  $1 \times 10^{-4}$  over 100,000 steps and then decaying over the remaining 900,000 steps with a cosine schedule, and use a decoupled weight decay [30] of  $1 \times 10^{-4}$  for the encoder-decoder and discriminator. To capture longer time horizons during training and better evaluate temporal coherence, we downsample the MiT dataset from 25 FPS to 6 FPS and evaluate on videos of 10 frames at spatial resolution of  $128 \times 128$ .

## B.2 IMAGE CONDITIONAL VIDEO GENERATION

### B.2.1 BAIR ROBOT PUSH C-ViViT ARCHITECTURE

We use a similar setup as in Section B.1, but the video tokenization step is done over  $4 \times 4$  spatial patches on the first image and  $2 \times 4 \times 4$  spatio-temporal patches in the rest of the video. The spatial encoder consists of 8 layers and the temporal encoder consists of 6 layers.

### B.2.2 KINETICS-600 C-ViViT ARCHITECTURE

We use a similar setup as in Section B.2.1, but both the spatial encoder and temporal encoder consist of 8 layers.

### B.2.3 MASKGIT ARCHITECTURE

To perform video prediction in latent space in the BAIR Robot Push and Kinetics-600 datasets, we use an unconditional transformer architecture consisting of 24 layers, 768 hidden units, 16 attention heads, dropout and attention dropout rate of 0.1, 3072 mlp hidden units.

### B.2.4 TRAINING AND INFERENCE

As described in Table 7, we train C-ViViT with the same optimizer setup as in Sec B.1, but we do not downsample the FPS of any of the datasets in this section for fair comparison with the video prediction baselines. We train MaskGIT on the video tokens extracted using C-ViViT in an unconditional setting, that is, we do not assume frames or text inputs to be given. During training, we use the Adam [27] optimizer with  $\beta_1 = 0.9$  and  $\beta_2 = 0.99$ . We use a linear learning rate warmup up to a peak value of  $1 \times 10^{-4}$  over 10,000 steps, and constant learning rate schedule for  $\sim 2M$  steps. At inference time, we initialize MaskGIT given a number of input frames, and predict the rest of the frames depending on the dataset on which we evaluate.

## B.3 TEXT CONDITIONAL VIDEO GENERATION

### B.3.1 ARCHITECTURE

In our text conditional video generation, we use the same C-ViViT architecture and training described in Section B.1. To train MaskGIT, we include a text conditioning in the form of T5X embeddings [41] which are used as input through the use of cross attention with the video tokens. We reduce the number of parameters of our base model for fairness in the quantitative comparisons against NUWA. The MaskGIT architecture used against NUWA consists of 20 transformer layers with 1536 hidden units, 24 attention heads, and 6144 MLP hidden units, resulting in 0.9B parameters similar to NUWA. For the main experiments in this paper, we use a larger architecture that

consists of consists of 24 transformer layers with 2048 hidden units, 32 attention heads, and 8192 mlp hidden units, resulting in 1.8B parameters.

### B.3.2 TRAINING AND INFERENCE

For all our text-conditional video generation, we use the training parameters Table 7

### B.3.3 INFERENCE PARAMETERS AGAINST NUWA

We use  $\lambda = 0.1$ , 12 MaskGIT iterations, and temperature of 4.0.

### B.3.4 INFERENCE PARAMETERS FOR ABLATION OF IMAGE AND VIDEO DATA FOR TRAINING.

We use  $\lambda = 6$ , 24 MaskGIT iterations, and temperature of 4.0.

### B.3.5 INFERENCE PARAMETERS FOR ALL VIDEOS IN THE PAPER.

We use  $\lambda = 12$ , 48 MaskGIT iterations, and temperature of 8.0.

**1st prompt:** "Side view of an astronaut is walking through a puddle on mars"

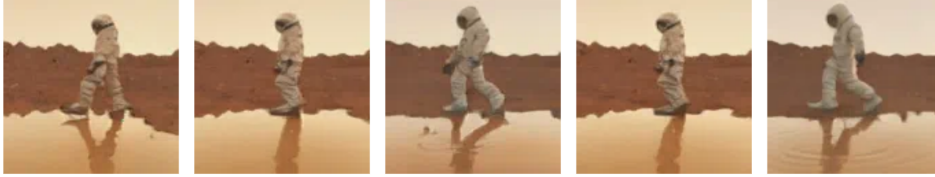

**2nd prompt:** "The astronaut is dancing on mars"

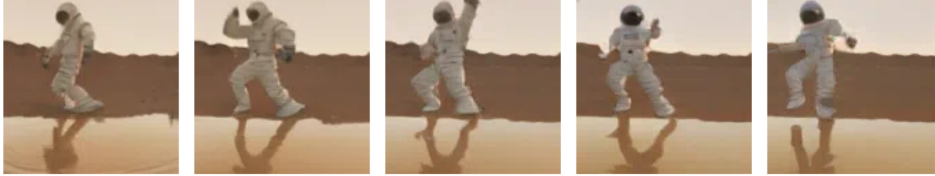

**3rd prompt:** "The astronaut walks his dog on mars"

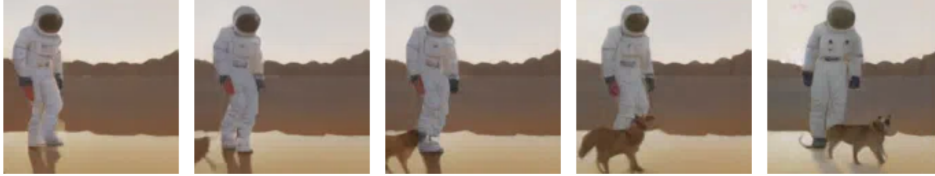

**4rd prompt:** "The astronaut and his dog watch fireworks"

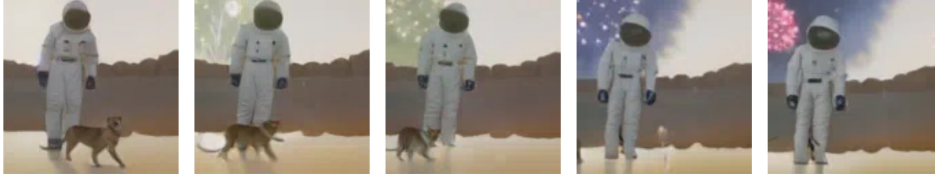

**Figure 5.** Another example of story conditional video generation. Full videos are available at [phenaki.github.io](https://phenaki.github.io).

## C OTHER EXPERIMENTS

### C.1 CLASS CONDITIONAL VIDEO GENERATION

In order to compare Phenaki with more previous work, we train a smaller version of the model with 345M parameters on UCF-101 [47] while conditioning it on the class of each video. As it can be

**Table 8.** Quantitative results of video generation on class conditional UCF-101 [47]. We report FVD numbers of a smaller version of Phenaki with 345M parameters. The numbers for other method after 540K training steps. The FVD numbers for previous methods are taken from [16].

| Method         | FVD↓ |
|----------------|------|
| TGANv2 [44]    | 1209 |
| CogVideo [22]  | 626  |
| TATS [16]      | 332  |
| Phenaki (Ours) | 250  |

**Table 9.** Training and inference speed of Phenaki.

| Size | Condition | Training       |               |                |               | MaskGIT Iterations | Inference Time |
|------|-----------|----------------|---------------|----------------|---------------|--------------------|----------------|
|      |           | C-ViViT        |               | MaskGiT        |               |                    |                |
|      |           | Number of TPUs | Training Time | Number of TPUs | Training Time |                    |                |
| 1.8B | Text      | 64             | 81 hours      | 512            | 126 Hours     | 24                 | 4 FPS          |
| 345M | Class     | 64             | 65 hours      | 64             | 49 Hours      | 128                | 2 FPS          |

seen in Table 8, Phenaki outperforms all of the previous work. We use a temperature of 6.0, 128 MaskGIT iterations during sampling, and no classifier free guidance during training or evaluation for simplicity in our experiments.

## D COMPUTATIONAL COST

As mentioned in the paper, training Phenaki has two main stages. First, training C-ViViT which takes  $\sim 81$  hours on 64 TPUs and second training MaskGIT which takes  $\sim 126$  hours on 512 TPUs. Our 1.8B parameter text-conditioned model runs 24 MaskGIT iterations during sampling and generates video at  $\sim 4$  frames per second. In addition, we provide a summary of the computational cost for the 345M parameter class-conditioned model used in Section C which runs 128 MaskGIT iterations during sampling and generates videos at  $\sim 2$  frames per second. A summary of these numbers can be seen in Table 9.

## E STYLIZATION FROM IMAGE DATASETS

To highlight the stylization learned from images in our model, we provide comparisons of generations from the model trained only with video data and with a combination of video and image datasets in our website [phenaki.github.io/style\\_videos.html](https://phenaki.github.io/style_videos.html).

## F LONG VIDEO GENERATION

To highlight the long term generation in our model, we provide 5 minute videos given the same prompt during the entire generation in our website [phenaki.github.io/five\\_min\\_videos.html](https://phenaki.github.io/five_min_videos.html).
